# Supplementary material for: Assess the Impact of Obesity on Pregnancy and Neonatal Outcomes among Saudi Women at King Abdulaziz Medical City Jeddah
Source: Preprints.org preprint supplement (doi:10.20944/preprints202102.0475.v1), 2021-02-22
Supplement: Supplementary file 1 [file supplementary]

**Tables**

**Table 1 The Sociodemographic characteristics of study’s participants.**

| Variable | categories | N= 186 | % |
| --- | --- | --- | --- |
| Age | Less 24 | 15 | 8.1 |
|  | 25-29 | 53 | 28.5 |
|  | 30-34 | 50 | 26.9 |
|  | 35-39 | 45 | 24.2 |
|  | 40-45 | 23 | 12.4 |
| Primigravida | Yes | 31 | 16.7 |
|  | No | 155 | 83.3 |
| Multigravida | Yes | 155 | 83.3 |
|  | No | 31 | 16.7 |
| Previous delivery | SVD (Spontaneous vaginal delivery) | 126 | 67.7 |
|  | CS (Caesarean section) | 26 | 14.0 |
| Obesity | N/A (Primigravida)  Class1(BMI 30-34)  Class2(BMI 35-39)  Class3(BMI more than 40) | 34  128  44  14 | 18.3  68.8  23.7  7.5 |
| Smoking | Yes | 4 | 2.2 |
| Pre-existing thyroid disease  Recurrent miscarriages | No  Yes  No  Yes  No | 182  16  170  10  176 | 97.8  8.6  90.4  5.4  93.6 |

**Table 2 Association between Obesity and co-factors**

|  | Obesity | | | |
| --- | --- | --- | --- | --- |
|  | Class 1 (%) | Class 2 (%) | Class 3 (%) | P value* |
| Pre-existing thyroid disease  Yes | 16 (12.5) | 0 | 0 | 0.015 |
| No | 112 (87.5) | 44 (100) | 14 (100) |
| Pregnancy induced hypertension | 0  128 (100) | 0  44 (100) | 1 (7.1)  13 (92.9) | 0.075 |
| Perineal tear  First degree  Second degree  Third degree  Intact  Primigravida | 45 (35.2)  24 (18.8)  1(.8)  55 (43.0)  3 (2.3) | 13 (29.5)  4 (9.1)  0  24(54.5)  3 (6.8) | 1 (7.1)  4 (28.6)  0  6(42.9)  3 (21.4) | 0.020 |
| Episiotomy  Yes  No | 5 (3.9)  123 (96.1) | 3 (6.8)  41 (93.2) | 3 (21.4)  11 (78.6) | 0.037 |

**Table 3 Comparison of obesity classes within Pre-existing thyroid disease:**

| Obesity Pre-existing thyroid disease  Test Statistic | P.value |
| --- | --- |
| Class1-class2 -11.625  Class1-class3 -11.625  Class2-class3 0.000 | .033  .343  1.000 |
| Obesity Induced Hypertension  Test Statistic | P.value |
| Class3-class1 6.643  Class3-class2 6.643  Class1-class2 0.000 | .001  .001  1.000 |
| Obesity Perineal tears  Test Statistic | P.value |
| Class1-class2 -14.077  Class1-class3 -32.876  Class2-class3 -18.799 | .108  .020  .222 |
| Obesity Episiotomy  Test Statistic | P.value |
| Class3-class2 13.588  Class3-class1 16.296  Class2-class1 2.708 | .044  .008  0.481 |
